# Supplementary material
Source: Royal Society of Chemistry journal article supplement (doi:10.1039/d6dt00088f)
Supplement: d6dt00088f1.pdf [file d6dt00088f1.pdf]

# Ce(III) containing tricobalt-substituted silico-tungstate $[\text{CeCo}_3\text{Si}_2\text{W}_{20}\text{O}_{74}(\text{NO}_3)(\text{OH})(\text{H}_2\text{O})]^{13-}$ : A versatile nano-cluster with a multitude of applications

*Shivani,<sup>[a]</sup> Vivek Das, <sup>[a,b]</sup>Ahsan ul haq,<sup>[a]</sup> Shivangi Prandiyal,<sup>[c]</sup> Anwar Alam,<sup>[c]</sup> Anne-Lucie Teillout,<sup>[d]</sup> Pedro de Oliveira,<sup>[d]</sup> Arun Kant,<sup>[e]</sup> Himani Chahar,<sup>[f]</sup> Debabrata Mishra,<sup>[f]</sup> Olivier Blacque,<sup>[g]</sup> Firasat Hussain<sup>[a]</sup> \**

## Table of Contents

|                                                                                                                                                                                                                                                                                                                                                                                                               |            |
|---------------------------------------------------------------------------------------------------------------------------------------------------------------------------------------------------------------------------------------------------------------------------------------------------------------------------------------------------------------------------------------------------------------|------------|
| <b>Table S1.</b> Crystal data and structure refinement for <b>La-1a</b> and <b>Ce-2a</b> .....                                                                                                                                                                                                                                                                                                                | <b>S4</b>  |
| <b>Table S2.</b> Crystal data and structure refinement for <b>Pr-3a</b> and <b>Nd-4a</b> .....                                                                                                                                                                                                                                                                                                                | <b>S5</b>  |
| <b>Table S3.</b> Dye Degradation Performance of 3d-4f Heterometallic Silicotungstates and Related POMs.....                                                                                                                                                                                                                                                                                                   | <b>S6</b>  |
| <b>Table S4.</b> IC <sub>50</sub> value of reported Polyoxotungstates (POTS) on different cancer cell Lines - Cytotoxicity Data.....                                                                                                                                                                                                                                                                          | <b>S7</b>  |
| <b>Table S5.</b> Average overpotential at -10 mA/cm <sup>2</sup> for different electrode materials.....                                                                                                                                                                                                                                                                                                       | <b>S8</b>  |
| <b>Figure S1.</b> Ball-and-stick representation of polyanion [LnCo <sub>3</sub> Si <sub>2</sub> W <sub>20</sub> O <sub>74</sub> (NO <sub>3</sub> )(OH)(H <sub>2</sub> O)] <sup>13-</sup> ( <b>1a-4a</b> ).....                                                                                                                                                                                                | <b>S9</b>  |
| <b>Figure S2.</b> [A] FT-IR spectra of the nanoclusters ( <b>1a-4a</b> ); [B] Spectral Comparison of (SiW <sub>9</sub> O <sub>34</sub> ) Ligand and <b>1a</b> .....                                                                                                                                                                                                                                           | <b>S10</b> |
| <b>Figure S3.</b> Thermogravimetric analysis curve of the complexes ( <b>1a- 14a</b> ).....                                                                                                                                                                                                                                                                                                                   | <b>S11</b> |
| <b>Figure S4.</b> CVs recorded at a scan rate of 100 mV.s <sup>-1</sup> , with a POM concentration of 0.2 mM in 0.5 M Li <sub>2</sub> SO <sub>4</sub> + H <sub>2</sub> SO <sub>4</sub> / pH 3.00, at two different reverse potentials. [A] La ( <b>1a</b> ) [B] Pr ( <b>3a</b> ) [C] Nd ( <b>4a</b> ).....                                                                                                    | <b>S13</b> |
| <b>Figure S5.</b> CVs recorded at a scan rate of 100 mV.s <sup>-1</sup> , with a POM concentration of 0.2 mM in 1.0 M LiCH <sub>3</sub> COO.2H <sub>2</sub> O + CH <sub>3</sub> COOH / pH 5.00, for all the POMs in the series studied individually.....                                                                                                                                                      | <b>S14</b> |
| <b>Figure S6.</b> CVs recorded at a scan rate of 100 mV.s <sup>-1</sup> for all the POMs in the series, studied individually at a concentration of 0.2 mM, in 0.5 M Li <sub>2</sub> SO <sub>4</sub> + H <sub>2</sub> SO <sub>4</sub> / pH 3.00 and in 1.0 M LiCH <sub>3</sub> COO.2H <sub>2</sub> O + CH <sub>3</sub> COOH / pH 5.00.....                                                                     | <b>S15</b> |
| <b>Figure S7.</b> CVs recorded at a scan rate of 100 mV.s <sup>-1</sup> for all the POMs in the series, studied individually at a concentration of 0.2 mM, in (A) 0.5 M Li <sub>2</sub> SO <sub>4</sub> + H <sub>2</sub> SO <sub>4</sub> / pH 3.00 and in (B) 1.0 M LiCH <sub>3</sub> COO.2H <sub>2</sub> O + CH <sub>3</sub> COOH / pH 5.00.....                                                             | <b>S16</b> |
| <b>Figure S8.</b> CVs recorded at a scan rate of 10 mV.s <sup>-1</sup> for all the POMs in the series, studied individually at a concentration of 0.2 mM, in 1.0 M LiCH <sub>3</sub> COO.2H <sub>2</sub> O + CH <sub>3</sub> COOH / pH 5.00..                                                                                                                                                                 | <b>S17</b> |
| <b>Figure S9.</b> CVs recorded at a scan rate of 100 mV.s <sup>-1</sup> with La- ( <b>1a</b> ) [blue] and with Pr- ( <b>3a</b> ) [green], studied individually at a concentration of 0.2 mM, in 0.5 M Li <sub>2</sub> SO <sub>4</sub> + H <sub>2</sub> SO <sub>4</sub> / pH 3.00. (A) Initial scan direction towards the positive potentials. (B) Initial scan direction towards the negative potentials..... | <b>S18</b> |
| <b>Figure S10.</b> Proposed Mechanism of Photocatalytic dye degradation.....                                                                                                                                                                                                                                                                                                                                  | <b>S19</b> |

**Figure S11.** Linear sweep voltammograms for Ce-based POM catalyst in 0.5 M KCl (black), 0.5 M H<sub>2</sub>SO<sub>4</sub> (Red), and 0.5 M Na<sub>2</sub>SO<sub>4</sub> (Blue).....**S20**

**Figure S12.** The molecular structures of polyanions (**1a-4a**) shown without cations (Cs<sup>+</sup>, K<sup>+</sup>) and isolated water molecules. Displacement ellipsoids are drawn at the 30% probability level.....**S21**

**References**.....**S23**

**Table S1. Crystal data and structure refinement for La-1a and Ce-2a**

| Identification code                            | La-1a                                                                                              | Ce-2a                                                                                           |
|------------------------------------------------|----------------------------------------------------------------------------------------------------|-------------------------------------------------------------------------------------------------|
| CCDC number                                    | 2518417                                                                                            | 2518416                                                                                         |
| Empirical formula                              | $\text{Co}_3\text{Cs}_{0.75}\text{H}_{43}\text{K}_{12.25}\text{LaNO}_{99}\text{Si}_2\text{W}_{20}$ | $\text{CeCo}_3\text{Cs}_{0.75}\text{H}_3\text{K}_{12.25}\text{NO}_{99}\text{Si}_2\text{W}_{20}$ |
| Formula weight                                 | 6268.89                                                                                            | 6270.10                                                                                         |
| Temperature/K                                  | 150.00(10)                                                                                         | 149.94(15)                                                                                      |
| Crystal system                                 | triclinic                                                                                          | triclinic                                                                                       |
| Space group                                    | P-1                                                                                                | P-1                                                                                             |
| a/Å                                            | 11.67157(9)                                                                                        | 11.66600(10)                                                                                    |
| b/Å                                            | 12.44186(11)                                                                                       | 12.42430(10)                                                                                    |
| c/Å                                            | 36.1804(2)                                                                                         | 36.1689(3)                                                                                      |
| $\alpha/^\circ$                                | 90.7046(6)                                                                                         | 90.7070(10)                                                                                     |
| $\beta/^\circ$                                 | 97.6008(6)                                                                                         | 97.7140(10)                                                                                     |
| $\gamma/^\circ$                                | 116.1071(8)                                                                                        | 116.0880(10)                                                                                    |
| Volume/Å <sup>3</sup>                          | 4661.78(7)                                                                                         | 4650.66(8)                                                                                      |
| Z                                              | 2                                                                                                  | 2                                                                                               |
| $\rho_{\text{calc}}/\text{g}/\text{cm}^3$      | 4.466                                                                                              | 4.478                                                                                           |
| $\mu/\text{mm}^{-1}$                           | 26.510                                                                                             | 26.603                                                                                          |
| F(000)                                         | 5524.0                                                                                             | 5526.0                                                                                          |
| Crystal size/mm <sup>3</sup>                   | 0.22 × 0.12 × 0.03                                                                                 | 0.29 × 0.12 × 0.03                                                                              |
| Radiation                                      | Mo K $\alpha$ ( $\lambda = 0.71073$ )                                                              | Mo K $\alpha$ ( $\lambda = 0.71073$ )                                                           |
| 2 $\Theta$ range for data collection/ $^\circ$ | 4.232 to 52.744                                                                                    | 4.45 to 52.744                                                                                  |
| Index ranges                                   | -14 ≤ h ≤ 14, -15 ≤ k ≤ 15, -45 ≤ l ≤ 45                                                           | -14 ≤ h ≤ 14, -15 ≤ k ≤ 15, -45 ≤ l ≤ 45                                                        |
| Reflections collected                          | 115428                                                                                             | 114560                                                                                          |
| Independent reflections                        | 19071 [ $R_{\text{int}} = 0.0360$ , $R_{\text{sigma}} = 0.0199$ ]                                  | 19029 [ $R_{\text{int}} = 0.0339$ , $R_{\text{sigma}} = 0.0210$ ]                               |
| Data/restraints/parameters                     | 19071/296/1373                                                                                     | 19029/301/1390                                                                                  |
| Goodness-of-fit on F <sup>2</sup>              | 1.245                                                                                              | 1.205                                                                                           |
| Final R indexes [ $I \geq 2\sigma(I)$ ]        | $R_1 = 0.0342$ , $wR_2 = 0.0746$                                                                   | $R_1 = 0.0374$ , $wR_2 = 0.0825$                                                                |
| Final R indexes [all data]                     | $R_1 = 0.0355$ , $wR_2 = 0.0751$                                                                   | $R_1 = 0.0396$ , $wR_2 = 0.0834$                                                                |
| Largest diff. peak/hole / e Å <sup>-3</sup>    | 4.70/-1.76                                                                                         | 4.07/-2.23                                                                                      |

**Table S2. Crystal data and structure refinement for Pr-3a and Nd-4a**

| Identification code                         | Pr-3a                                                                                                                   | Nd-4a                                                                                                                   |
|---------------------------------------------|-------------------------------------------------------------------------------------------------------------------------|-------------------------------------------------------------------------------------------------------------------------|
| CCDC number                                 | 2518418                                                                                                                 | 2518805                                                                                                                 |
| Empirical formula                           | Co <sub>3</sub> Cs <sub>0.75</sub> H <sub>3</sub> K <sub>12.25</sub> NO <sub>99</sub> PrSi <sub>2</sub> W <sub>20</sub> | Co <sub>3</sub> Cs <sub>0.75</sub> H <sub>3</sub> K <sub>12.25</sub> NNdO <sub>99</sub> Si <sub>2</sub> W <sub>20</sub> |
| Formula weight                              | 6270.89                                                                                                                 | 6274.22                                                                                                                 |
| Temperature/K                               | 150.00(10)                                                                                                              | 150.00(10)                                                                                                              |
| Crystal system                              | triclinic                                                                                                               | triclinic                                                                                                               |
| Space group                                 | P-1                                                                                                                     | P-1                                                                                                                     |
| a/Å                                         | 11.69060(10)                                                                                                            | 11.69490(10)                                                                                                            |
| b/Å                                         | 12.46520(10)                                                                                                            | 12.4491(2)                                                                                                              |
| c/Å                                         | 36.2275(2)                                                                                                              | 36.2187(4)                                                                                                              |
| α/°                                         | 90.7940(10)                                                                                                             | 90.6260(10)                                                                                                             |
| β/°                                         | 97.7140(10)                                                                                                             | 97.9330(10)                                                                                                             |
| γ/°                                         | 116.1050(10)                                                                                                            | 116.0320(10)                                                                                                            |
| Volume/Å <sup>3</sup>                       | 4682.03(7)                                                                                                              | 4677.64(11)                                                                                                             |
| Z                                           | 2                                                                                                                       | 2                                                                                                                       |
| ρ <sub>calc</sub> /g/cm <sup>3</sup>        | 4.448                                                                                                                   | 4.455                                                                                                                   |
| μ/mm <sup>-1</sup>                          | 26.459                                                                                                                  | 26.518                                                                                                                  |
| F(000)                                      | 5528.0                                                                                                                  | 5530.0                                                                                                                  |
| Crystal size/mm <sup>3</sup>                | 0.15 × 0.09 × 0.03                                                                                                      | 0.44 × 0.15 × 0.04                                                                                                      |
| Radiation                                   | Mo Kα (λ = 0.71073)                                                                                                     | Mo Kα (λ = 0.71073)                                                                                                     |
| 2θ range for data collection/°              | 4.44 to 52.744                                                                                                          | 4.25 to 52.742                                                                                                          |
| Index ranges                                | -14 ≤ h ≤ 14, -15 ≤ k ≤ 15, -45 ≤ l ≤ 45                                                                                | -14 ≤ h ≤ 14, -15 ≤ k ≤ 15, -45 ≤ l ≤ 45                                                                                |
| Reflections collected                       | 137231                                                                                                                  | 93044                                                                                                                   |
| Independent reflections                     | 19147 [R <sub>int</sub> = 0.0290, R <sub>sigma</sub> = 0.0164]                                                          | 19120 [R <sub>int</sub> = 0.0534, R <sub>sigma</sub> = 0.0327]                                                          |
| Data/restraints/parameters                  | 19147/260/1367                                                                                                          | 19120/289/1385                                                                                                          |
| Goodness-of-fit on F <sup>2</sup>           | 1.252                                                                                                                   | 1.187                                                                                                                   |
| Final R indexes [I >= 2σ (I)]               | R <sub>1</sub> = 0.0333, wR <sub>2</sub> = 0.0746                                                                       | R <sub>1</sub> = 0.0472, wR <sub>2</sub> = 0.1091                                                                       |
| Final R indexes [all data]                  | R <sub>1</sub> = 0.0343, wR <sub>2</sub> = 0.0749                                                                       | R <sub>1</sub> = 0.0508, wR <sub>2</sub> = 0.1106                                                                       |
| Largest diff. peak/hole / e Å <sup>-3</sup> | 5.54/-2.30                                                                                                              | 4.69/-1.95                                                                                                              |

**Table S3. Dye Degradation Performance of 3d-4f Heterometallic Silicotungstates and Related POMs.**

| S. No. | Dye                 | Polyoxometalate Catalyst                                                                                                                                                    | Removal | Time (Min) | Year | Ref. |
|--------|---------------------|-----------------------------------------------------------------------------------------------------------------------------------------------------------------------------|---------|------------|------|------|
| 1      | Congo Red (CR)      | $K_8[\alpha\text{-SiW}_{11}\text{O}_{39}]$                                                                                                                                  | 98.6    | 120        | 2025 | [1]  |
| 2      | Methylene Blue(MB)  | $K_4[\alpha\text{-SiW}_{12}\text{O}_{40}]$                                                                                                                                  | 98.4    | 120        | 2025 | [1]  |
| 3      | Methylene blue (MB) | $\text{SiW}_9\text{V}_3@\text{MIL-101}(\text{Cr})$                                                                                                                          | 100     | 12         | 2025 | [2]  |
| 4      | Rhodamine (RhB)     | $\text{SiW}_9\text{V}_3@\text{MIL-101}(\text{Cr})$                                                                                                                          | 100     | 18         | 2025 | [2]  |
| 5      | Methylene blue (MB) | $[\text{Cu}(\text{bte})_2(\text{H}_2\text{O})]_2[\text{SiMo}_{12}\text{O}_{40}] \cdot 2\text{H}_2\text{O}$ (bte = 1,2-bis(1,2,4-triazol-1-yl)ethane)                        | 84.58   | 160        | 2025 | [3]  |
| 6      | Methylene blue (MB) | $[\text{Cu}(\text{btb})_2]_2[\text{SiMo}_{12}\text{O}_{40}] \cdot \text{H}_2\text{O}$ (btb = 1,4-bis(1,2,4-triazol-1-yl)butane))                                            | 96.96   | 160        | 2025 | [3]  |
| 7      | Rhodamine B (RhB)   | $\text{ZnO}/\text{Ag}_4\text{SiW}_{12}\text{O}_{40}(\text{ZnO}/\text{AgSiW})$                                                                                               | 92.30%  | 60         | 2022 | [4]  |
| 8      | Methylene blue (MB) | $\text{SiW}_{12}/\text{MCM-22}$                                                                                                                                             | 95%     | 60         | 2021 | [5]  |
| 9      | Crystal violet (CV) | $\text{SiW}_{12}/\text{MCM-22}$                                                                                                                                             | 90%     | 60         | 2021 | [5]  |
| 10     | Methylene blue (MB) | $\{[\text{Co}_4(\text{L})_2(\text{HCOO})_2(\text{OH})_2][\text{SiO}_4(\text{W}_3\text{O}_9)_4]\} \cdot 6\text{DMF} \cdot 5\text{H}_2\text{O}$ [resorcin[4]arene ligand (L)] | 87.2    | 48h        | 2018 | [6]  |
| 11     | Methylene blue (MB) | $\{[\text{Zn}_4(\text{L})_2(\text{HCOO})_2(\text{OH})_2][\text{SiO}_4(\text{W}_3\text{O}_9)_4]\} \cdot 6\text{DMF} \cdot 5\text{H}_2\text{O}$ [resorcin[4]arene ligand (L)] | 67.3    | 48h        | 2018 | [6]  |
| 12     | Neutral red (NR)    | $\{[\text{Zn}_4(\text{L})_2(\text{HCOO})_2(\text{OH})_2][\text{SiO}_4(\text{W}_3\text{O}_9)_4]\} \cdot 6\text{DMF} \cdot 5\text{H}_2\text{O}$ [resorcin[4]arene ligand (L)] | 80      | 48h        | 2018 | [6]  |

**Table S4. IC<sub>50</sub> value of reported Polyoxotungstates (POTS) on different cancer cell Lines - Cytotoxicity Data**

| <b>POM Formula/Abbreviation</b>                                                                                                                                                  | <b>Cancer Cell Line</b>        | <b>IC<sub>50</sub> (72h)</b> | <b>Ref.</b> |
|----------------------------------------------------------------------------------------------------------------------------------------------------------------------------------|--------------------------------|------------------------------|-------------|
| [Co(H <sub>2</sub> O) <sub>6</sub> {CoSb <sub>6</sub> O <sub>4</sub> (H <sub>2</sub> O) <sub>3</sub> [Co(hmta)SbW <sub>8</sub> O <sub>31</sub> ] <sub>3</sub> }] <sup>13-</sup>  | A2780 (ovarian)                | 0.77 μM                      | [7]         |
| Same compound                                                                                                                                                                    | A2780cis (cisplatin-resistant) | 4.35 μM                      | [7]         |
| Same compound                                                                                                                                                                    | A549 (lung)                    | 12.65 μM                     | [7]         |
| Same compound                                                                                                                                                                    | OVCAR-3 (ovarian)              | 1.78 μM                      | [7]         |
| Same compound                                                                                                                                                                    | MCF-7 (breast)                 | 12.24 μM                     | [7]         |
| <b>C<sub>25</sub>N<sub>10</sub>Na<sub>0.7</sub>Co<sub>5.3</sub>O<sub>76</sub>Sb<sub>2</sub>W<sub>18</sub></b>                                                                    | AGS (gastric)                  | 1.42 μM                      | [8]         |
| <b>{Sb<sub>8</sub>W<sub>36</sub>}</b>                                                                                                                                            | BGC-823 (gastric)              | 8.68 μM                      | [8]         |
| <b>PAC-320</b><br>({(n-Bu)Sn(OH)} <sub>3</sub> GeW <sub>9</sub> O <sub>34</sub> ) <sup>4-</sup> )                                                                                | DU145 (prostate)               | 4.55 μM                      | [9]         |
| <b>PAC-320</b>                                                                                                                                                                   | LNCaP (prostate)               | 5.64 μM                      | [9]         |
| <b>PW<sub>9</sub>Cu</b><br>(K <sub>7</sub> Na <sub>3</sub> [Cu <sub>4</sub> (H <sub>2</sub> O) <sub>2</sub> (PW <sub>9</sub> O <sub>34</sub> ) <sub>2</sub> ·20H <sub>2</sub> O) | MG-63 (osteosarcoma)           | 22.00 μM (48h)               | [[10]       |

**Table S5. Average overpotential at -10 mA/cm<sup>2</sup> for different electrode materials**

| <b>Electrode Name</b> | <b>Average Overpotential<br/>@ -10 mA/cm<sup>2</sup></b> |
|-----------------------|----------------------------------------------------------|
| GC                    | 1.30 ± 0.02                                              |
| Ligand                | 1.32 ± 0.02                                              |
| Pr                    | 1.23 ± 0.02                                              |
| Nd                    | 1.16 ± 0.01                                              |
| La                    | 1.15 ± 0.01                                              |
| Ce                    | 1.11 ± 0.03                                              |

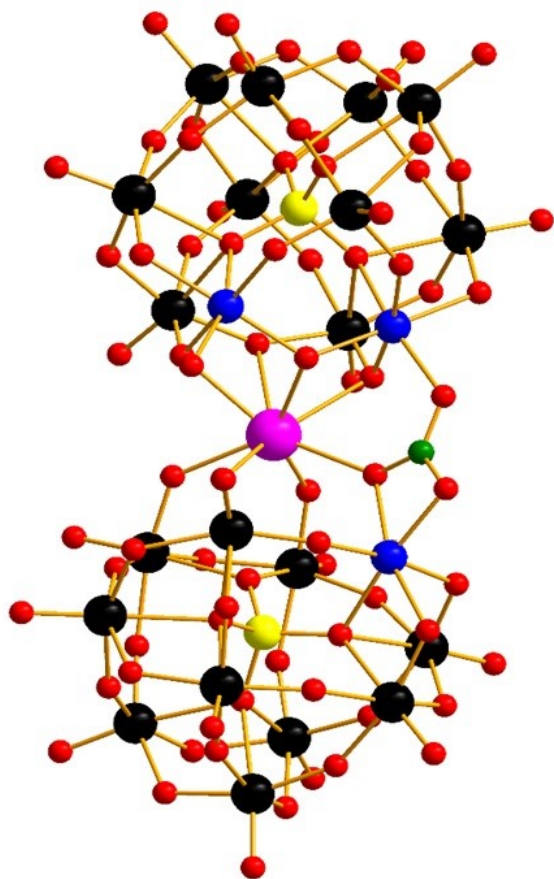

**Figure S1.** Ball and stick representation of polyanion  $[\text{LnCo}_3\text{Si}_2\text{W}_{20}\text{O}_{74}(\text{NO}_3)(\text{OH})(\text{H}_2\text{O})]^{13-}$ . (Colour code: Si = yellow sphere, W = black sphere, Ln = pink sphere, O = red sphere, Co = blue sphere, N = sea green sphere).

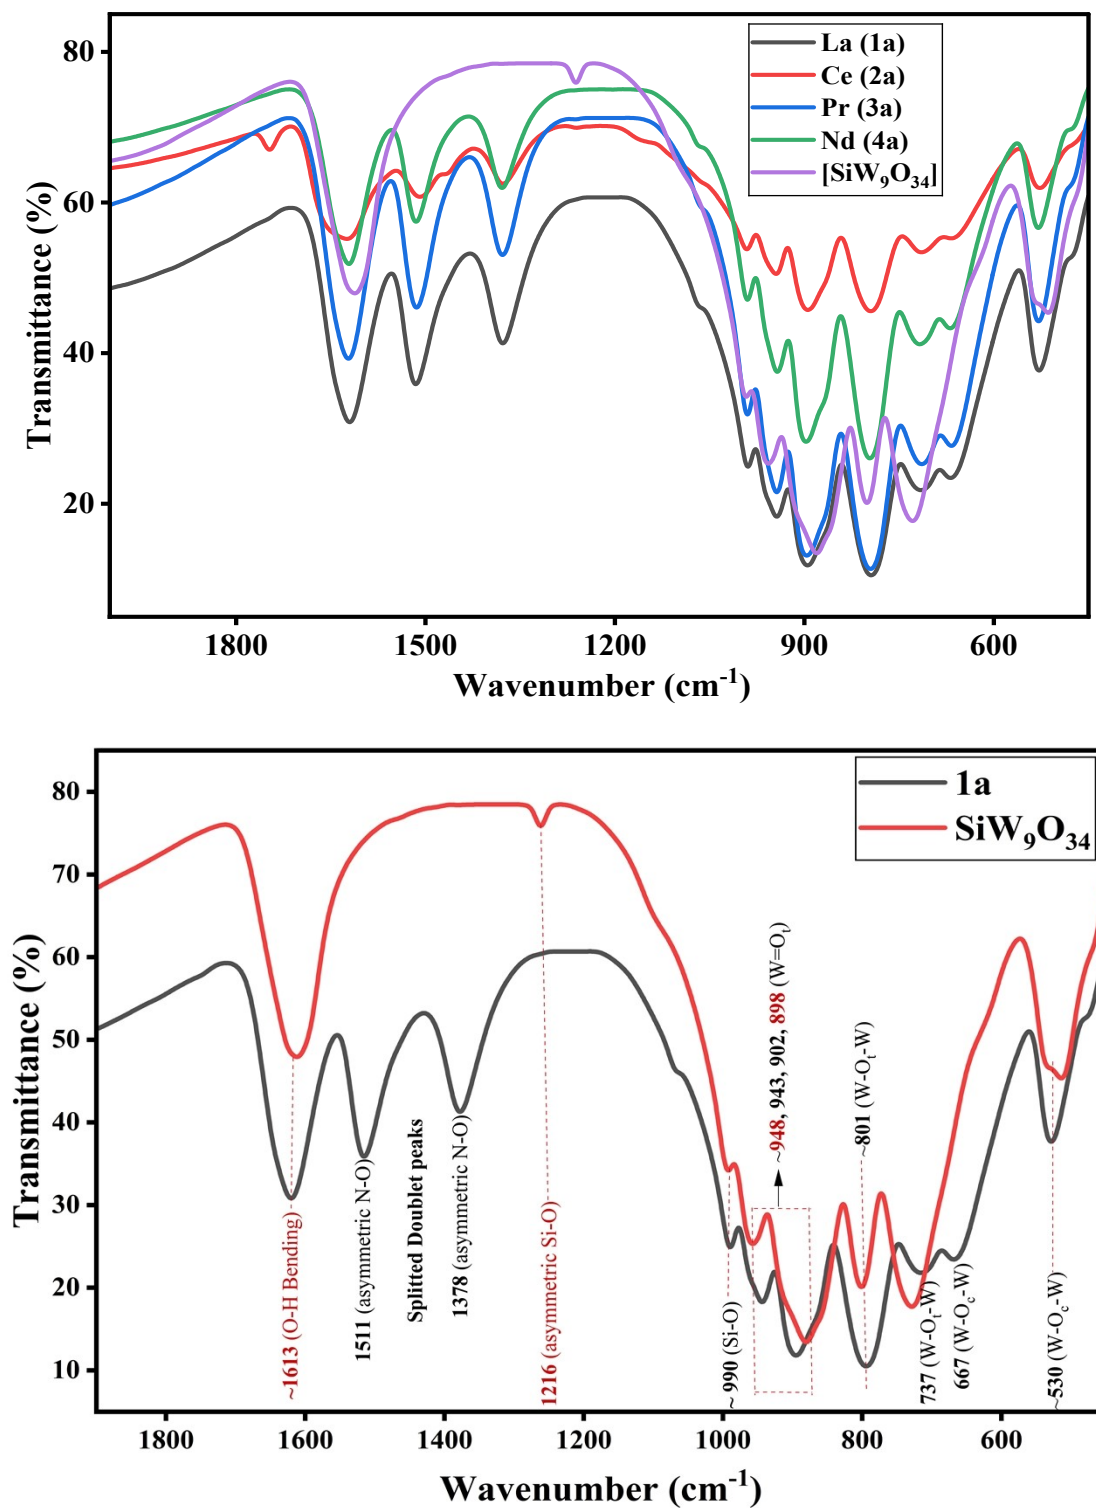

**Figure S2.** [A] The FT-IR spectra of the nanoclusters (**1a-4a**) (recorded on the KBr pellets). [B] Spectral Comparison of ( $\text{SiW}_9\text{O}_{34}$ ) Ligand and **1a**

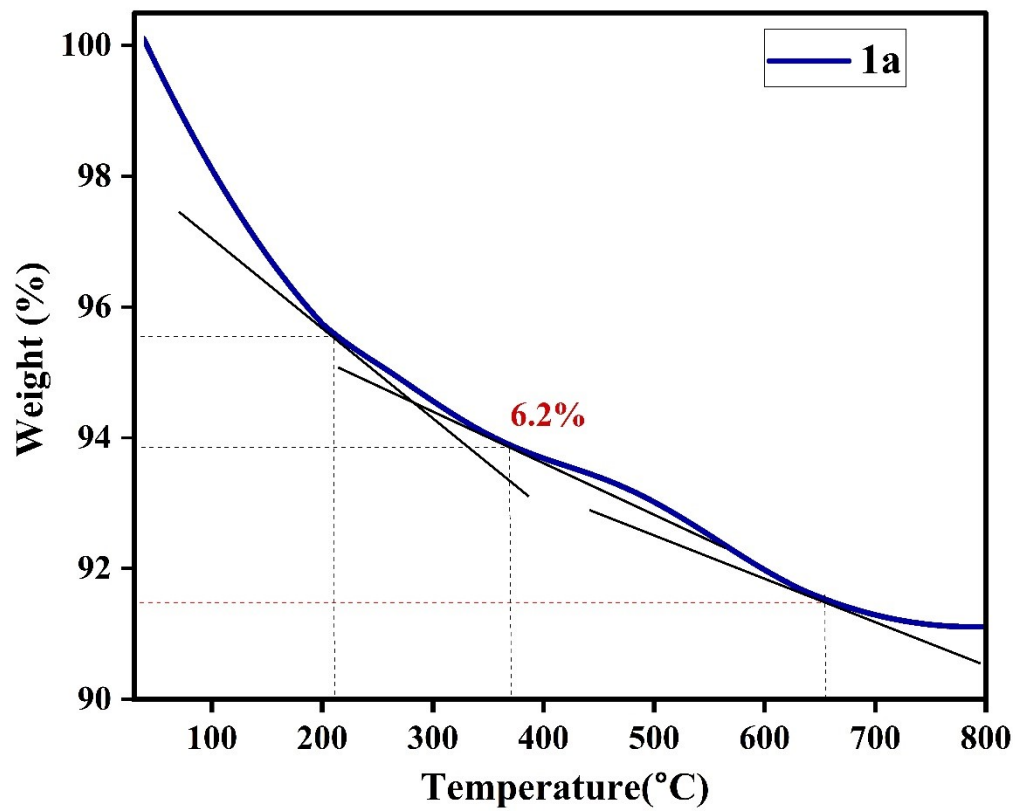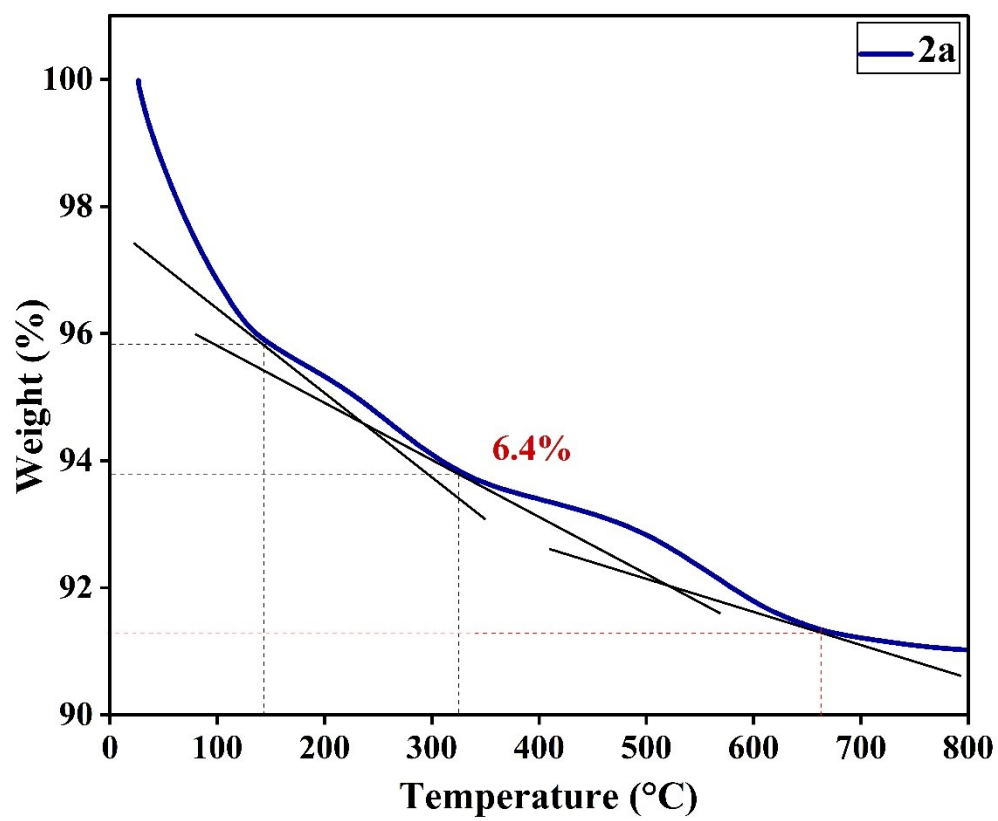

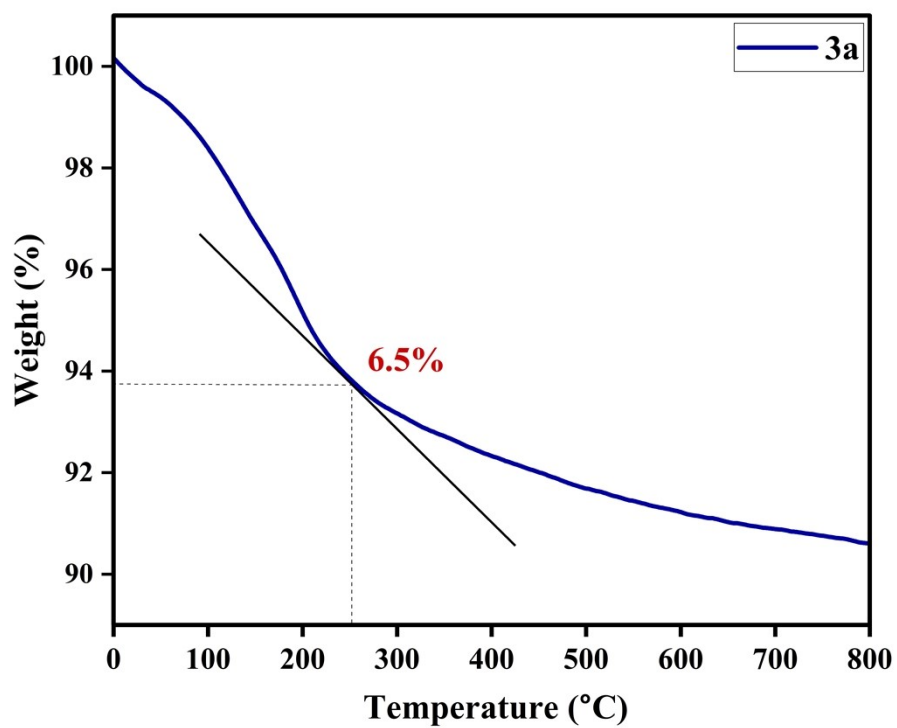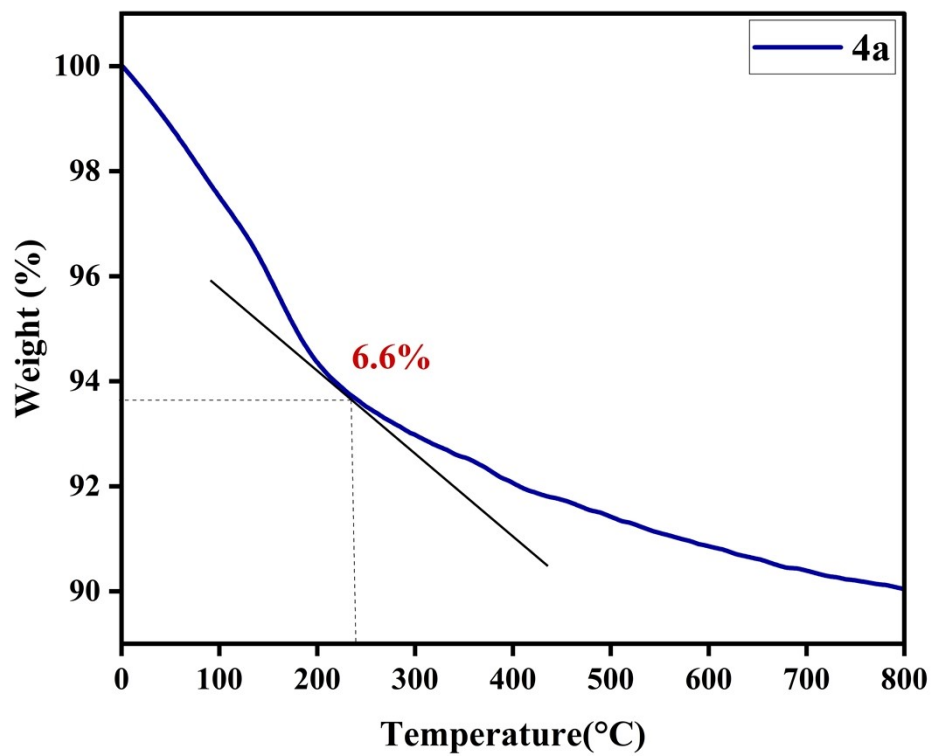

**Figure S3.** Thermogravimetric analysis curve of the complexes  $[\text{LnCo}_3\text{Si}_2\text{W}_{20}\text{O}_{74}(\text{NO}_3)(\text{OH})(\text{H}_2\text{O})]^{13-}$  (**1a-4a**). Here, Ln = La<sup>III</sup> (**1a**), Ce<sup>III</sup> (**2a**), Pr<sup>III</sup> (**3a**), Nd<sup>III</sup> (**4a**).

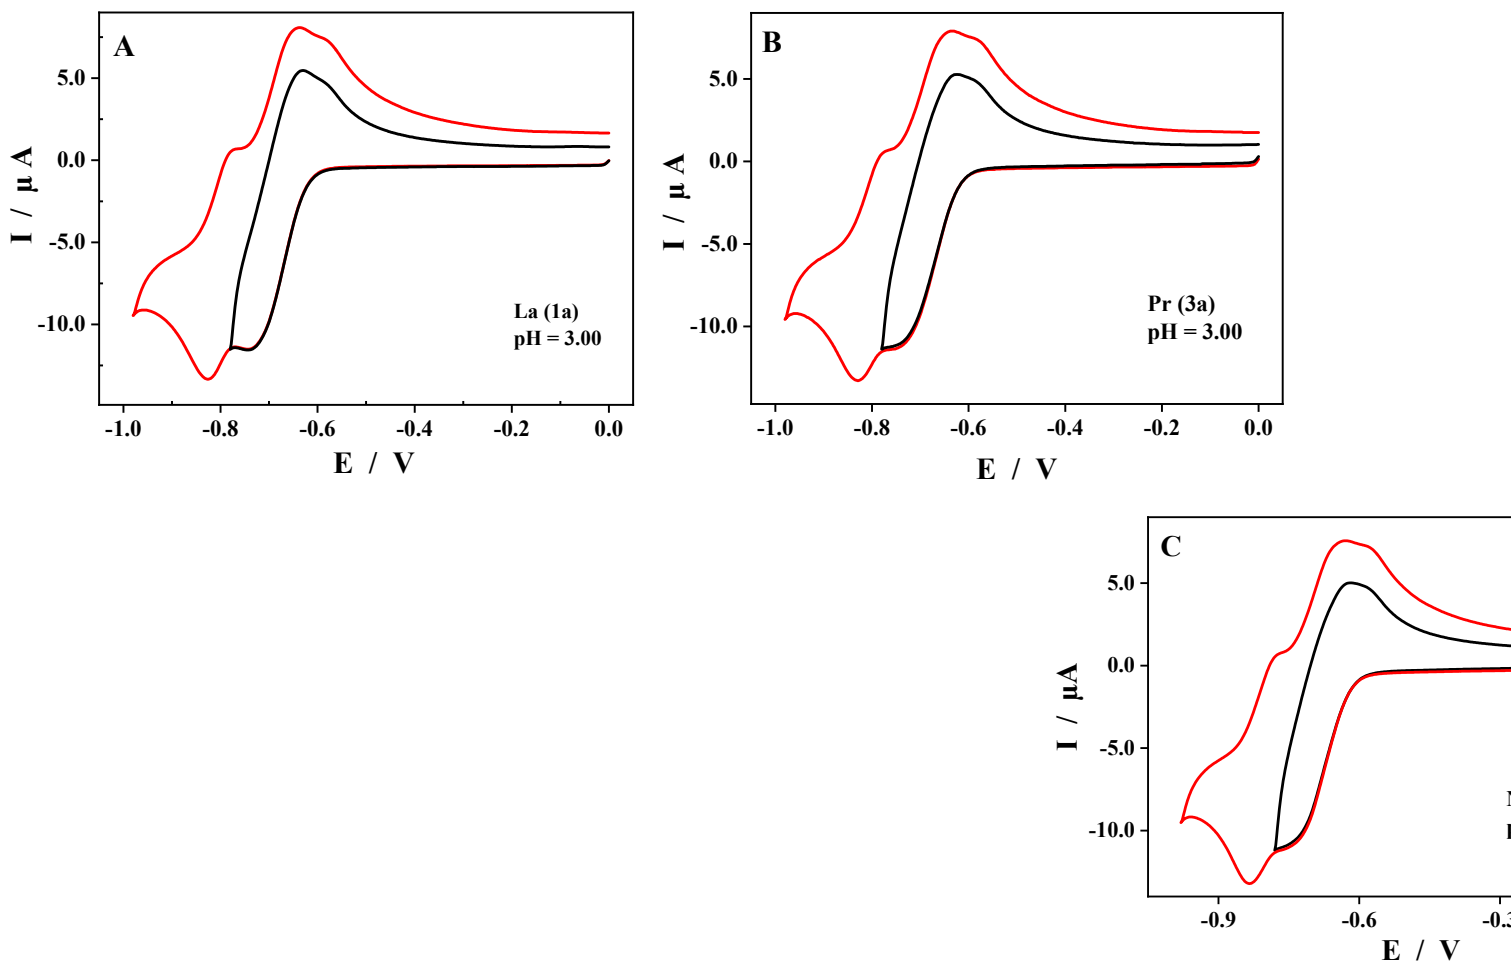

**Figure S4.** CVs recorded at a scan rate of  $100 \text{ mV}\cdot\text{s}^{-1}$ , with a POM concentration of  $0.2 \text{ mM}$  in  $0.5 \text{ M Li}_2\text{SO}_4 + \text{H}_2\text{SO}_4 / \text{pH } 3.00$ , at two different reverse potentials. [A] La (**1a**) [B] Pr (**3a**) [C] Nd (**4a**).

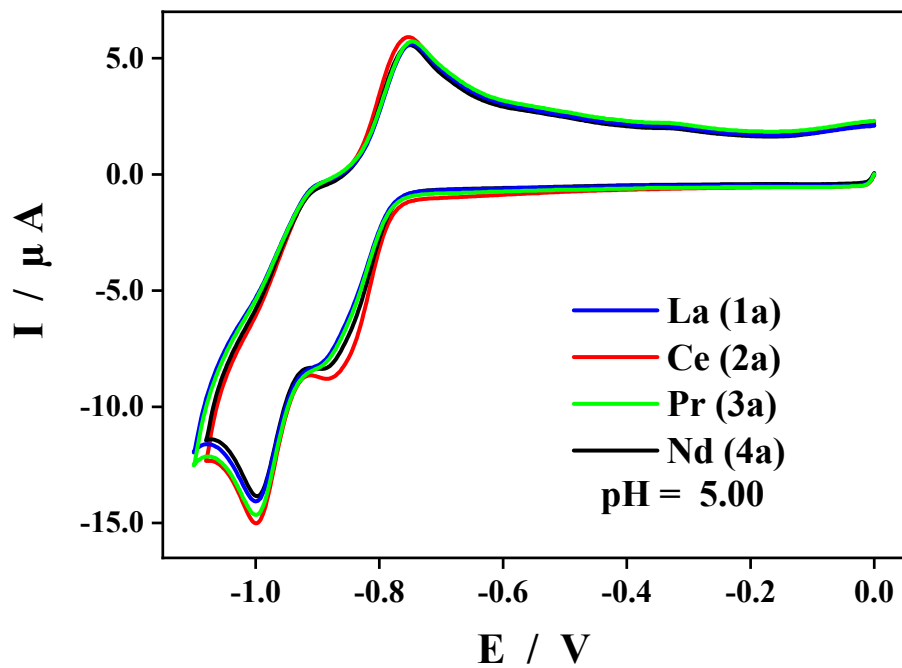

**Figure S5.** CVs recorded at a scan rate of  $100 \text{ mV}\cdot\text{s}^{-1}$ , with a POM concentration of  $0.2 \text{ mM}$  in  $1.0 \text{ M LiCH}_3\text{COO}\cdot 2\text{H}_2\text{O} + \text{CH}_3\text{COOH} / \text{pH } 5.00$ , for all the POMs in the series studied individually.

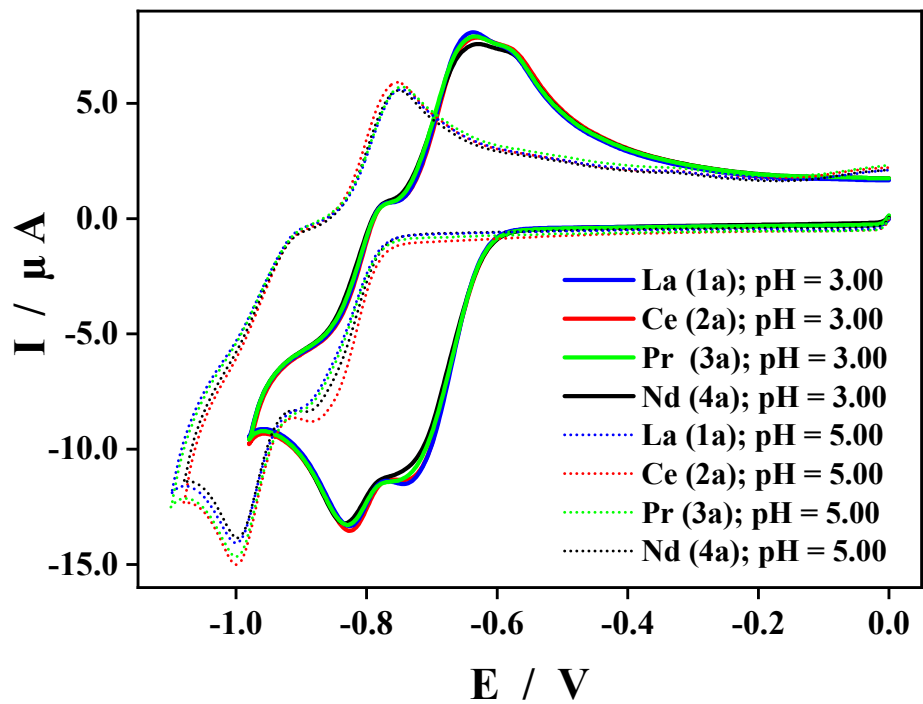

**Figure S6.** CVs recorded at a scan rate of  $100 \text{ mV}\cdot\text{s}^{-1}$  for all the POMs in the series, studied individually at a concentration of  $0.2 \text{ mM}$ , in  $0.5 \text{ M Li}_2\text{SO}_4 + \text{H}_2\text{SO}_4 / \text{pH } 3.00$  and in  $1.0 \text{ M LiCH}_3\text{COO}\cdot 2\text{H}_2\text{O} + \text{CH}_3\text{COOH} / \text{pH } 5.00$ .

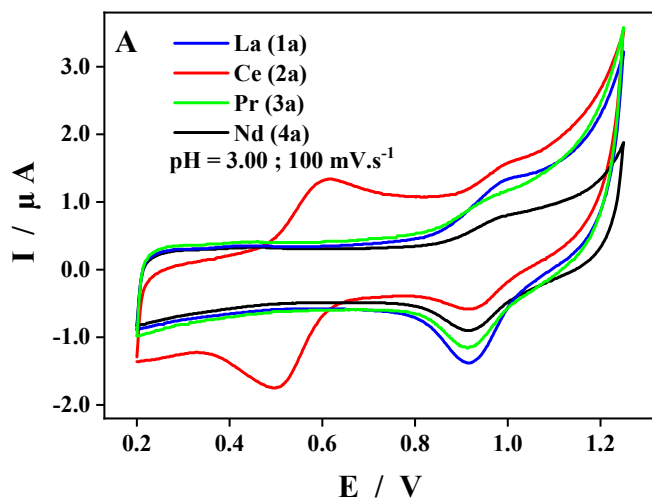

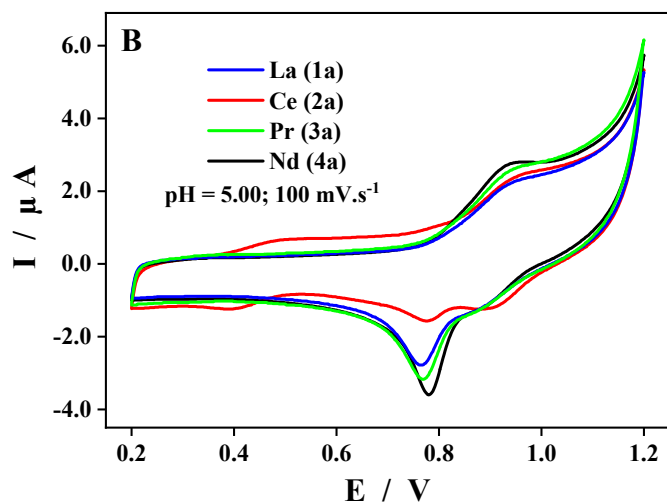

**Figure S7.** CVs recorded at a scan rate of  $100 \text{ mV}\cdot\text{s}^{-1}$  for all the POMs in the series, studied individually at a concentration of  $0.2 \text{ mM}$ , in (A)  $0.5 \text{ M Li}_2\text{SO}_4 + \text{H}_2\text{SO}_4 / \text{pH } 3.00$  and in (B)  $1.0 \text{ M LiCH}_3\text{COO}\cdot 2\text{H}_2\text{O} + \text{CH}_3\text{COOH} / \text{pH } 5.00$ .

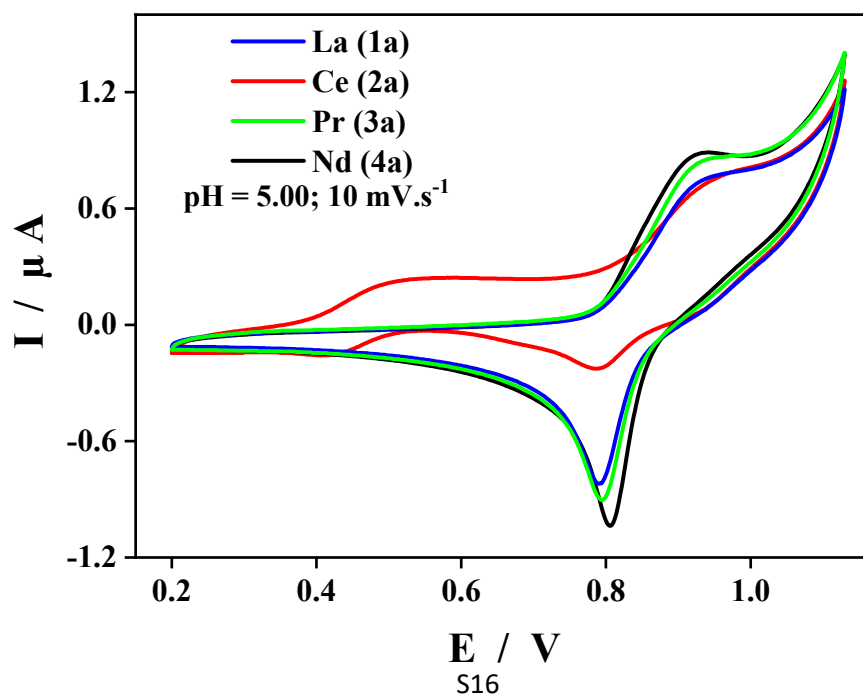

**Figure S8.** CVs recorded at a scan rate of  $10 \text{ mV}\cdot\text{s}^{-1}$  for all the POMs in the series, studied individually at a concentration of  $0.2 \text{ mM}$ , in  $1.0 \text{ M LiCH}_3\text{COO}\cdot 2\text{H}_2\text{O} + \text{CH}_3\text{COOH} / \text{pH } 5.00$ .

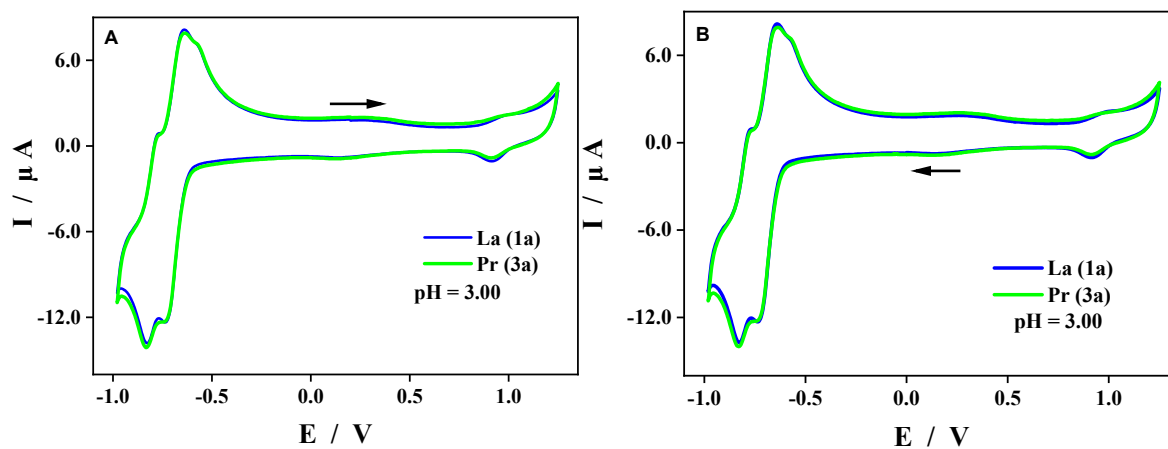

**Figure S9.** CVs recorded at a scan rate of  $100 \text{ mV}\cdot\text{s}^{-1}$  with La- (**1a**) [blue] and with Pr- (**3a**) [green], studied individually at a concentration of  $0.2 \text{ mM}$ , in  $0.5 \text{ M Li}_2\text{SO}_4 + \text{H}_2\text{SO}_4 / \text{pH } 3.00$ . (A) Initial scan direction towards the positive potentials. (B) Initial scan direction towards the negative potentials.

**Photocatalytic Mechanism:**

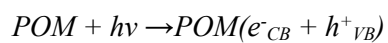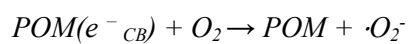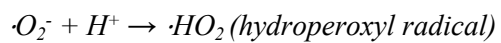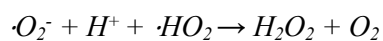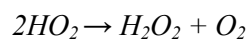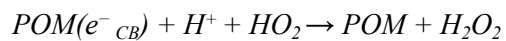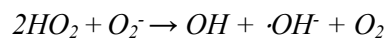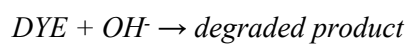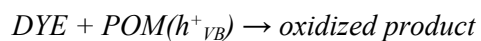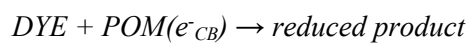

**Figure S10.** Proposed Mechanism of Photocatalytic dye degradation

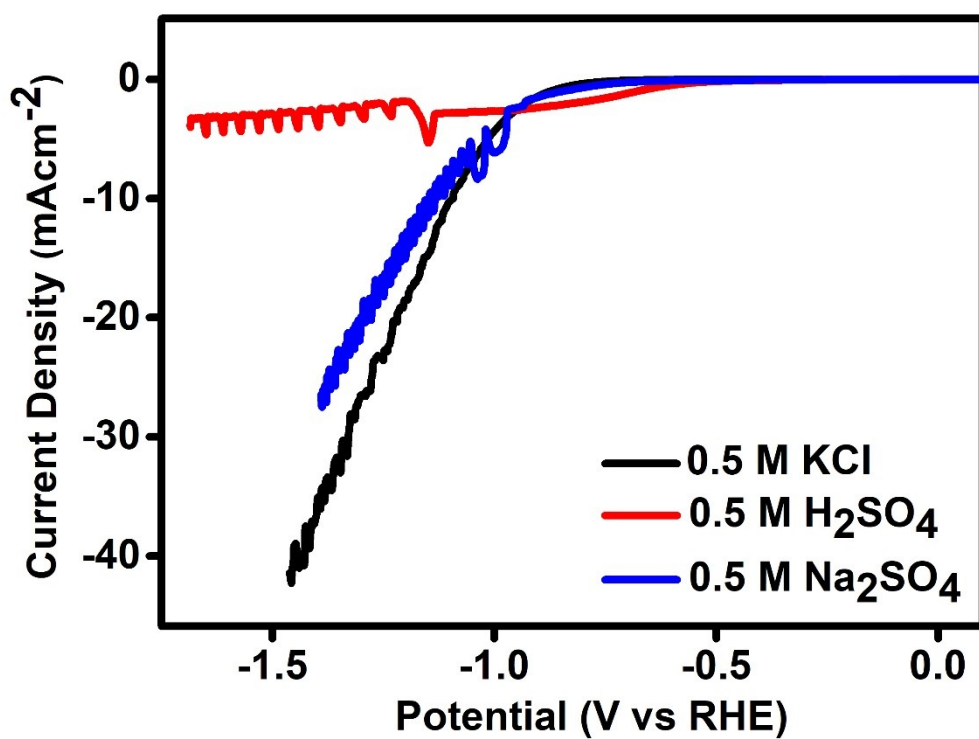

**Figure S11.** Linear sweep voltammograms for Ce-based POM catalyst in 0.5 M KCl (black), 0.5 M H<sub>2</sub>SO<sub>4</sub> (Red), and 0.5 M Na<sub>2</sub>SO<sub>4</sub> (Blue).

a)

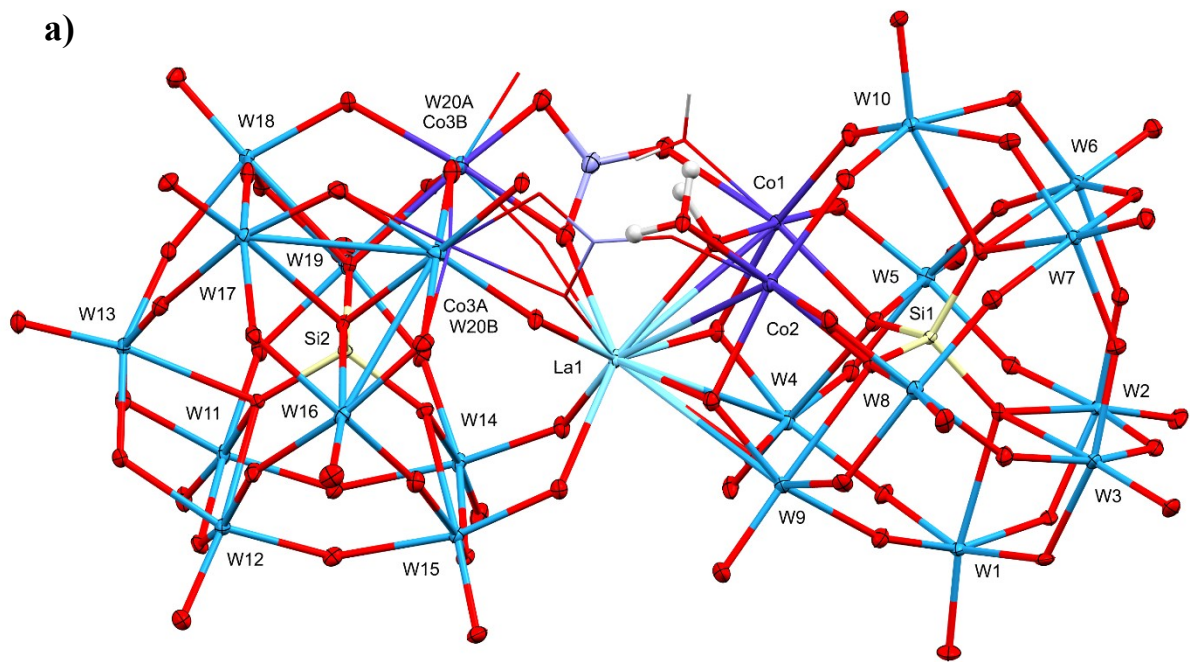

b)

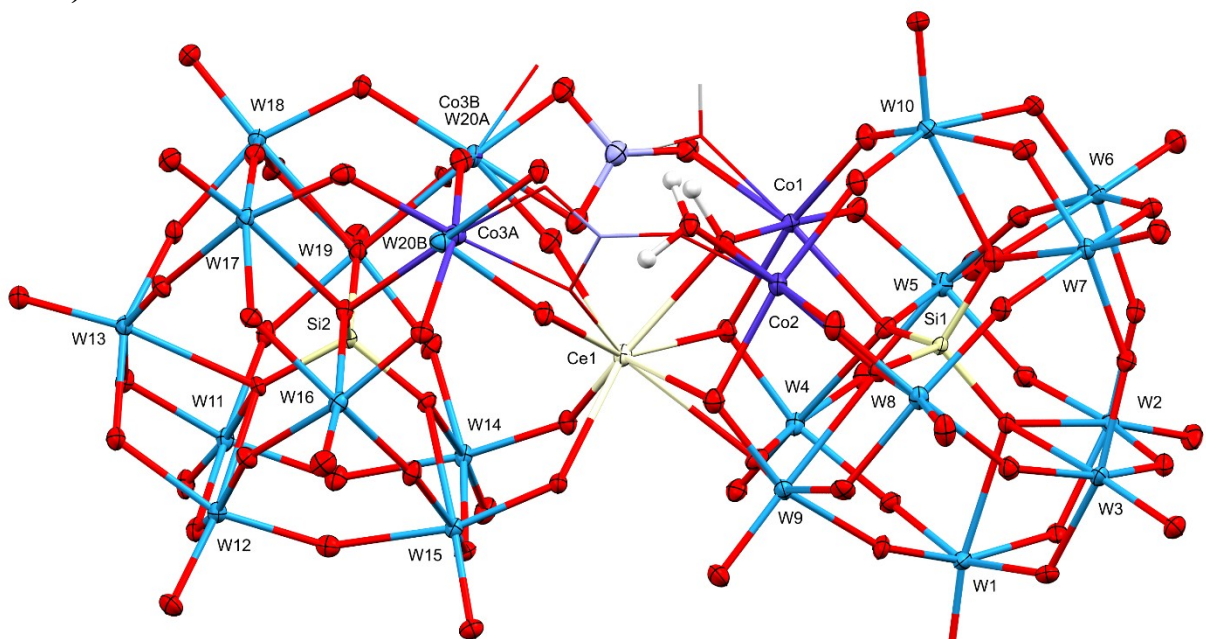

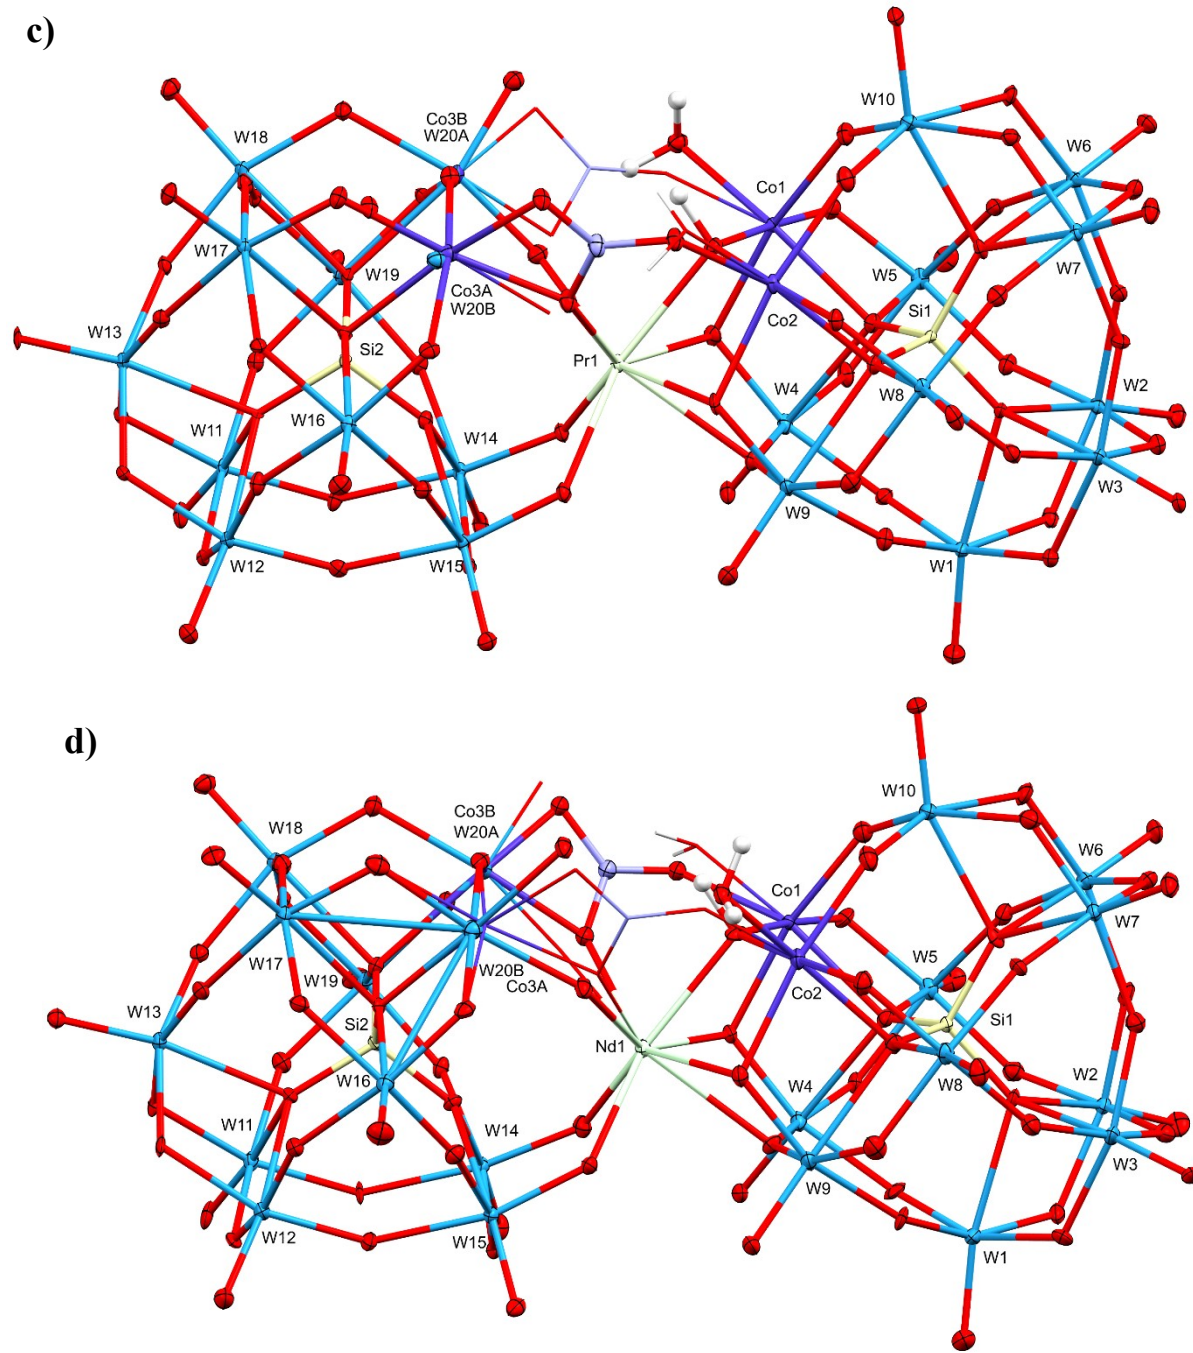

**Figure S12.** The molecular structures of polyanions: a) **1a**, b) **2a**, c) **3a**, d) **4a** shown without cations ( $\text{Cs}^+$ ,  $\text{K}^+$ ) and isolated water molecules. Displacement ellipsoids are drawn at the 30% probability level.

## References

- [1] M. A. Fashapoyeh, S. Shokrollahzadeh, A. M. Isloor, and C. Streb, Efficient multi-pollutant removal: The role of Keggin polyoxometalates in polysulfone-chitosan blend membranes, *Int. J. Biol. Macromol.*, **2025**, 311.
- [2] H. Malmir, F. M. Zonoz, M. Baghayeri, and R. Tayebee, Synthesis, characterization, and application of mixed-addenda silicon vanado tungstate polyoxometalate integrated into nanoporous MIL-101(Cr) for the quick removal of organic dyes from water, *RSC Adv.*, **2025**, 15, 12, 8918–8930.
- [3] W. W. Leow, Facile Synthesis of Hybrid-Polyoxometalates Nanocomposite for Degradation of Cationic and Anionic Dyes in Water Treatment, *Appl. Sci. Eng. Prog.*, **2024**.
- [4] R. Guo, Construction of ZnO/Keggin Polyoxometalate Nano-heterojunction Catalyst for Efficient Removal of Rhodamine B in Aqueous Solution, *J. Inorg. Organomet. Polym. Mater.*, **2022**, 32, 1599–1615.
- [5] D. Pithadia, V. Hegde, V. P. Brahmkhatri, and A. Patel, New catalyst comprising Silicotungstic acid and MCM-22 for degradation of some organic dyes, *Environ. Sci. Pollut. Res.*, **2020**.
- [6] Q. Y. Zhai, J. Su, T. T. Guo, J. Yang, J. F. Ma, and J. S. Chen, Two Porous Polyoxometalate-Resorcin arene-Based Supramolecular Complexes: Selective adsorption of organic dyes and electrochemical properties, *Cryst. Growth Des.*, **2018**, 18, 10, 6046–6053.
- [7] Y. Zheng, H. Gan, Y. Zhao, W. Li, Y. Wu, X. Yan, Y. Wang, J. Li, J. li and X. Wang, Self-Assembly and Antitumor Activity of a Polyoxovanadate-Based Coordination Nanocage. *Chemistry–A European Journal*, **2019**, 25(67), 15326-15332.
- [8] H. Zhao, L. Tao, F. Zhang, Y. Zhang, Y. Liu, H. Xu, G. Diao, L. Ni, Transition metal substituted sandwich-type polyoxometalates with a strong metal–C (imidazole) bond as anticancer agents. *Chem. Comm.*, **2019**, 55(8), 1096-1099.
- [9] Z. Dong, Y. Yang, S. Liu, J. Lu, B. Huang and Y. Zhang, HDAC inhibitor PAC-320 induces G<sub>2</sub>/M cell cycle arrest and apoptosis in human prostate cancer, *Oncotarget.*, **2017**, 512-523.
- [10] I. E. Leon, V. Porro, S. Astrada, M. G. Egusquiza, C.I. Cabello, M. Bollati-Fogolin and S.B. Etcheverry, Polyoxometalates as antitumor agents: bioactivity of a new polyoxometalate with copper on a human osteosarcoma model, *Chemico-biological interactions*, **2014**, 222, 87-96.
